# Supplementary material for: Plasma lipidomics profile in pregnancy and gestational diabetes risk: a prospective study in a multiracial/ethnic cohort
Source: PubMed Central journal article supplement (PMC7939004; doi:10.1136/bmjdrc-2020-001551), 2021-03-05

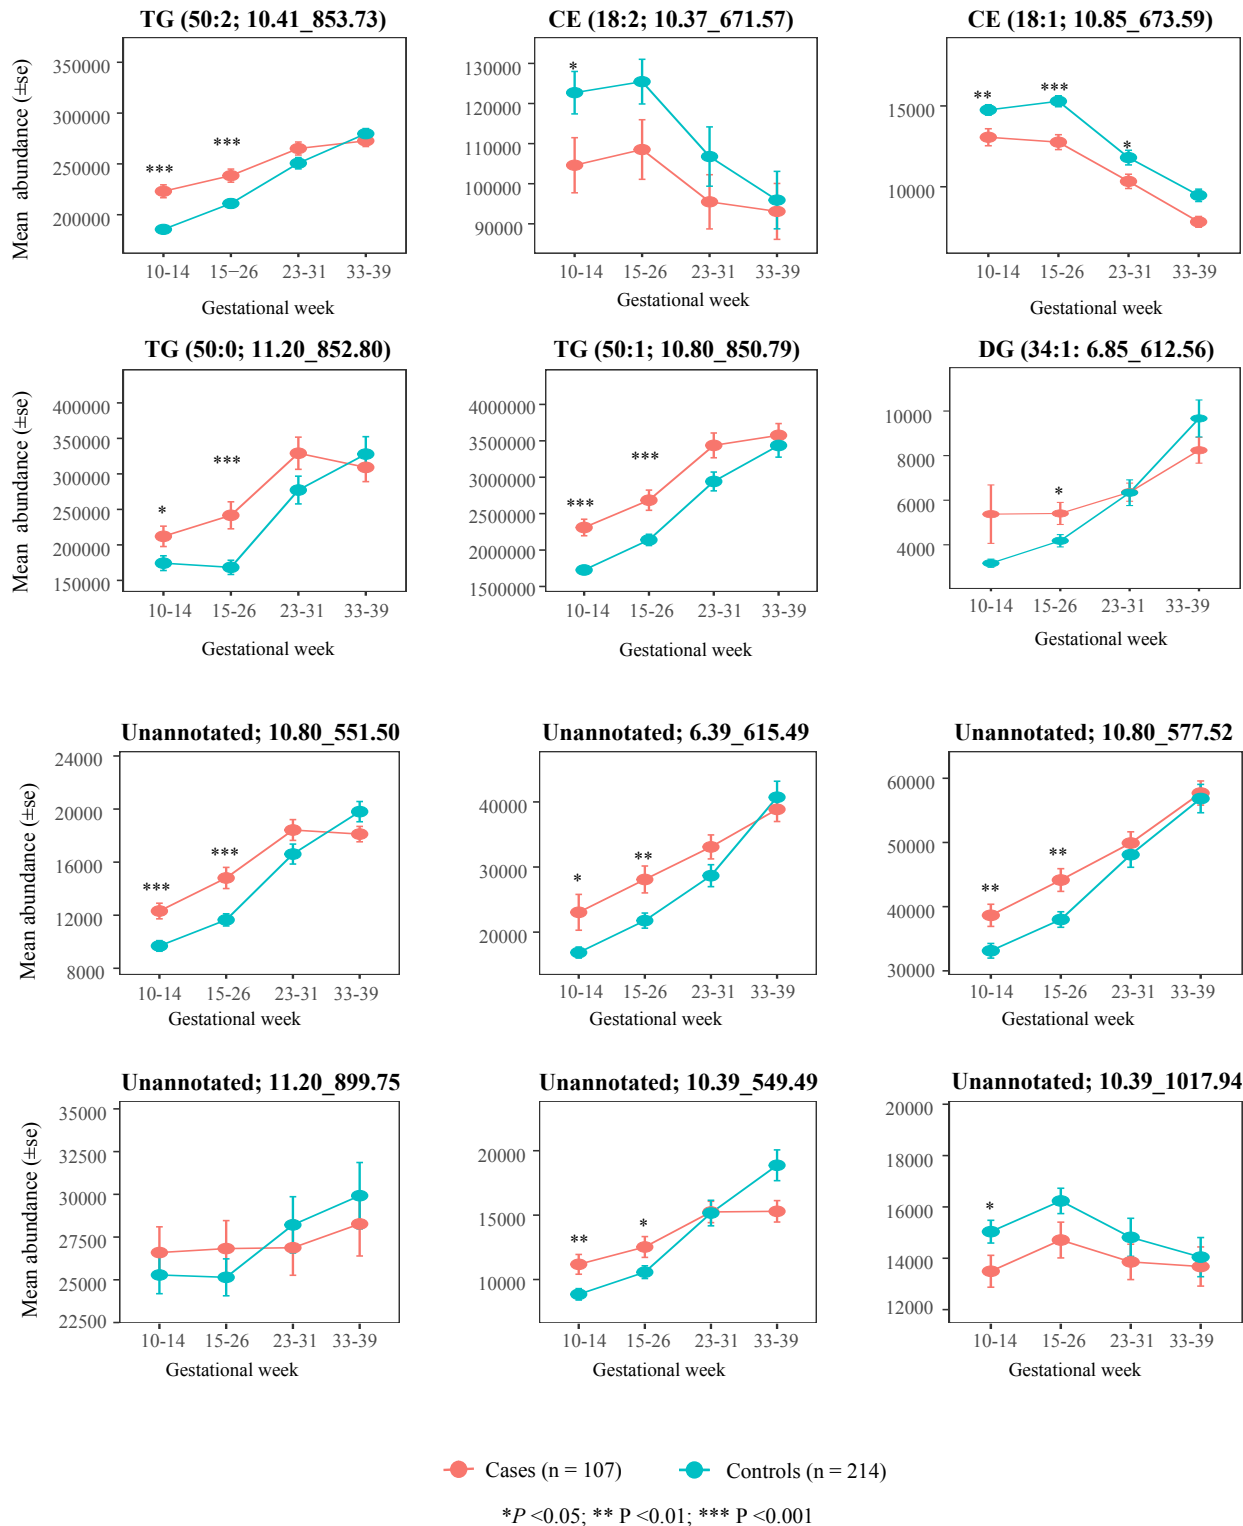

Supplement: bmjdrc-2020-001551supp005.pdf [file bmjdrc-2020-001551supp005.pdf]
