# Supplementary material for: Plasma lipidomics profile in pregnancy and gestational diabetes risk: a prospective study in a multiracial/ethnic cohort
Source: PubMed Central journal article supplement (PMC7939004; doi:10.1136/bmjdrc-2020-001551), 2021-03-05
Supplement: bmjdrc-2020-001551supp006.pdf [file bmjdrc-2020-001551supp006.pdf]

**Supplementary table S2.** Associations of lipid networks with GDM risk stratified by disease severity and study visit

| Lipid networks | Visit 0 (10-14 weeks)                                                                      |       |                 |                                                                                            |       |                 | Visit 1 (15-26 weeks)                                                                      |       |                 |                                                                                             |       |                 |
|----------------|--------------------------------------------------------------------------------------------|-------|-----------------|--------------------------------------------------------------------------------------------|-------|-----------------|--------------------------------------------------------------------------------------------|-------|-----------------|---------------------------------------------------------------------------------------------|-------|-----------------|
|                | GDM women not taking medication and their matched controls (n= 144; 45 cases, 99 controls) |       |                 | GDM Women taking medication and their matched controls (n = 144; 48 cases and 96 controls) |       |                 | GDM women not taking medication and their matched controls (n= 140; 47 cases, 93 controls) |       |                 | GDM Women taking medication and their matched controls (n = 155; 52 cases and 103 controls) |       |                 |
|                | $\beta$                                                                                    | se    | <i>p</i> -value | $\beta$                                                                                    | se    | <i>p</i> -value | $\beta$                                                                                    | se    | <i>p</i> -value | $\beta$                                                                                     | se    | <i>p</i> -value |
| Red            | 0.000                                                                                      | 0.009 | 0.988           | -0.011                                                                                     | 0.009 | 0.230           | 0.006                                                                                      | 0.018 | 0.742           | 0.050                                                                                       | 0.032 | 0.121           |
| Turquoise      | -0.024                                                                                     | 0.007 | <b>0.001</b>    | -0.006                                                                                     | 0.007 | 0.417           | -0.028                                                                                     | 0.013 | <b>0.038</b>    | -0.016                                                                                      | 0.021 | 0.438           |
| Yellow         | 0.030                                                                                      | 0.010 | <b>0.005</b>    | 0.013                                                                                      | 0.011 | 0.252           | 0.024                                                                                      | 0.017 | 0.178           | 0.021                                                                                       | 0.028 | 0.460           |
| Black          | -0.018                                                                                     | 0.008 | <b>0.039</b>    | 0.000                                                                                      | 0.007 | 0.965           | -----                                                                                      | ----- | -----           | -----                                                                                       | ----- | -----           |
| Blue           | -0.021                                                                                     | 0.007 | <b>0.002</b>    | 0.001                                                                                      | 0.007 | 0.940           | -0.039                                                                                     | 0.015 | <b>0.010</b>    | 0.000                                                                                       | 0.024 | 0.997           |
| Brown          | 0.027                                                                                      | 0.008 | <b>0.001</b>    | 0.006                                                                                      | 0.009 | 0.469           | 0.033                                                                                      | 0.024 | 0.176           | 0.025                                                                                       | 0.036 | 0.488           |
| Green          | -0.008                                                                                     | 0.010 | 0.434           | -0.002                                                                                     | 0.011 | 0.889           | 0.001                                                                                      | 0.022 | 0.980           | -0.032                                                                                      | 0.040 | 0.429           |
| Pink           | 0.014                                                                                      | 0.009 | 0.111           | 0.004                                                                                      | 0.010 | 0.673           | -----                                                                                      | ----- | -----           | -----                                                                                       | ----- | -----           |

Models were adjusted for maternal age, enrollment BMI, family history of diabetes, alcohol use before pregnancy, race/ethnicity, and gestational age at blood collection
